# Supplementary material for: Predictions on the Phase Constitution of SmCo7−XMx Alloys by Data Mining
Source: MDPI journal article supplement (doi:10.3390/nano12091452), 2022-04-24
Supplement: s1 [file s1]

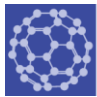

## Supplementary Materials

# Predictions on the Phase Constitution of $\text{SmCo}_{7-x}\text{M}_x$ Alloys by Data Mining

Guojing Xu, Hao Lu \*, Kai Guo, Fawei Tang and Xiaoyan Song \*

Faculty of Materials and Manufacturing, Key Laboratory of Advanced Functional Materials, Ministry of Education of China, Beijing University of Technology, Beijing 100124, China; GJ.xu@emails.bjut.edu.cn (G.X.); kevin\_gk@emails.bjut.edu.cn (K.G.); fawei\_tang@bjut.edu.cn (F.T.)

\* Correspondence: haolu@bjut.edu.cn (H.L.); xysong@bjut.edu.cn (X.S.)

Table S1. The symbols and meanings involved in the article.

| Symbol       | Meaning                                                              |
|--------------|----------------------------------------------------------------------|
| $M$          | doping elements                                                      |
| $x_c$        | the percentage of doping element substituting Co ( $x_c = 100x/7$ )  |
| $x_{sub}$    | the proportion of doping element substituting Co ( $x_{sub} = x/7$ ) |
| $X_{form}$   | material form                                                        |
| $X_{proc}$   | material preparation processes                                       |
| $X_{proc}^*$ | material preparation processes after further divide                  |
| $d$          | the average grain size of material                                   |
| $lgd$        | logarithm of the grain size                                          |
| $X_M$        | the intrinsic properties of elements                                 |
| $C, \sigma$  | hyperparameters of SVM model                                         |

Table S2. The optimal features and the mean AUC with different number of features.

| Number of features | Features                                                                                                                                                                                       | Mean AUC |
|--------------------|------------------------------------------------------------------------------------------------------------------------------------------------------------------------------------------------|----------|
| 0                  | BF                                                                                                                                                                                             | 0.65     |
| 1                  | BF, $x_{sub} \cdot T_{m-Co}$                                                                                                                                                                   | 0.75     |
| 2                  | BF, $x_{sub} \cdot T_m$ , $x_{sub} \cdot \chi_{Co}$                                                                                                                                            | 0.78     |
| 3                  | BF, $x_{sub} \cdot T_{m-Co}$ , $x_{sub} \cdot r_{a-Co}$ , $x_{sub} \cdot \kappa$                                                                                                               | 0.79     |
| 4                  | BF, $x_{sub} \cdot A_r$ , $x_{sub} \cdot T_{m-Co}$ , $x_{sub} \cdot \kappa$ , $x_{sub} \cdot \chi_{Sm}$                                                                                        | 0.80     |
| 5                  | BF, $x_{sub} \cdot A_r$ , $x_{sub} \cdot E_{i,1st-Sm}$ , $x_{sub} \cdot T_{m-Sm}$ , $x_{sub} \cdot r_{a-Sm}$ , $x_{sub} \cdot \chi$                                                            | 0.80     |
| 6                  | BF, $x_{sub} \cdot A_r$ , $x_{sub} \cdot E_{i,1st-Sm}$ , $x_{sub} \cdot T_{m-Sm}$ , $x_{sub} \cdot r_a$ , $x_{sub} \cdot \chi$ , $x_{sub} \cdot \Delta H_f$                                    | 0.79     |
| 7                  | BF, $x_{sub} \cdot A_r$ , $x_{sub} \cdot E_{i,1st-Sm}$ , $x_{sub} \cdot T_{m-Sm}$ , $x_{sub} \cdot r_a$ , $x_{sub} \cdot \chi_{Sm}$ , $x_{sub} \cdot \Delta H_f$ , $x_{sub} \cdot \kappa_{Co}$ | 0.78     |

To simplify the writing,  $X_{M-Co}$  denotes  $|X_{Co} - X_M|$ , and  $X_{M-Sm}$  denotes  $|X_{Sm} - X_M|$

Table S3. Design of independent variable space.

|       | $M$           | $x_c$   | $lgd / nm$ | $C_{proc}^*$                | $C_{form}$           |
|-------|---------------|---------|------------|-----------------------------|----------------------|
| Range | B, Al, C...Fe | 0–17.5% | 1–3        | Preparation, Heat treatment | Ribbon, Bulk, Powder |
| Step  | -             | 0.05%   | 0.1        | -                           | -                    |
| Count | 35            | 350     | 21         | 2                           | 3                    |

Table S4. LTECV grouping statistics.

| Group | Hf/Fe | Zr/Al | Ga/C | Ti/Ta | Ag/V | Si/Mn | Nb/Cr | Mo/Sn | Ge/B | Cu/Ni |
|-------|-------|-------|------|-------|------|-------|-------|-------|------|-------|
| All   | 35    | 35    | 35   | 29    | 27   | 31    | 28    | 29    | 23   | 27    |
| Other | 31    | 24    | 23   | 21    | 22   | 18    | 19    | 15    | 20   | 16    |
| Sum   | 66    | 59    | 58   | 50    | 49   | 49    | 47    | 44    | 43   | 43    |
